# Supplementary material for: EMPAS: Electron Microscopy Screening for Endogenous Protein Architectures
Source: PubMed Central journal article supplement — Mol Cells. 2020 Sep 18;43(9):804–12. doi: 10.14348/molcells.2020.0163 (PMC7528680; doi:10.14348/molcells.2020.0163), 2020-09-18
Supplement: molce-43-804_Supple.pdf [file molce-43-804_Supple.pdf]

## hESC

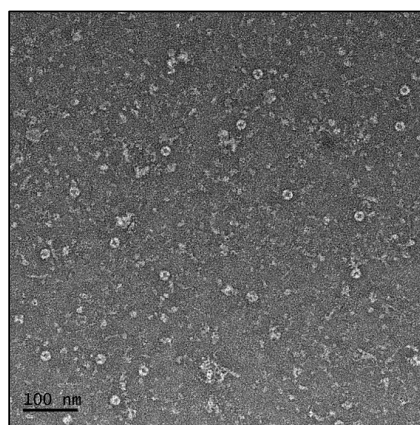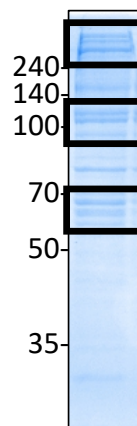

| Gene    | Mw (kDa) |
|---------|----------|
| FASN    | 273.25   |
| CAD     | 242.83   |
| HUWE1   | 481.59   |
| MYH9    | 226.39   |
| DYNC1H1 | 532.07   |

| Gene    | Mw (kDa) |
|---------|----------|
| VCP     | 89.27    |
| HSPA4   | 94.27    |
| PSMD2   | 100.14   |
| PSMD1   | 105.77   |
| HSP90B1 | 92.41    |

| Gene  | Mw (kDa) |
|-------|----------|
| CCT8  | 59.58    |
| TCP1  | 60.31    |
| HSPD1 | 61.02    |
| CCT2  | 57.45    |
| CCT7  | 59.33    |

## Cyanobacteria

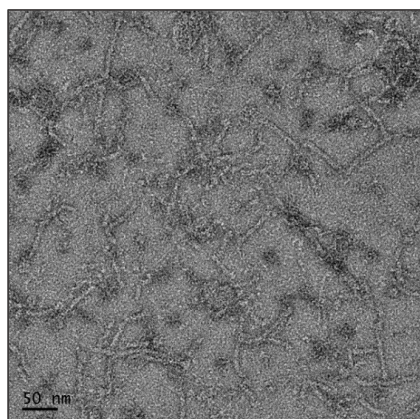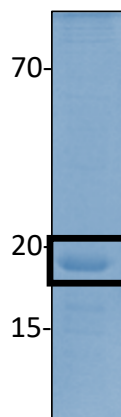

| Gene    | Mw (kDa) |
|---------|----------|
| cpcB    | 18.12    |
| ilvH    | 18.86    |
| rplE    | 20.22    |
| hofG    | 17.56    |
| slI1061 | 19.85    |

Supplementary Fig. S1. Mass spectrometry identification of proteins in hESCs and cyanobacteria.
